# Supplementary material for: Rapid and sensitive immunoassay for alpha-fetoprotein in serum by fabricating primary antibody–enzyme complexes using protein self-assembly
Source: Royal Society of Chemistry journal article supplement (doi:10.1039/d2ay02078e), 2023-01-01
Supplement: d2ay02078e1.pdf [file d2ay02078e1.pdf]

1

## Supporting Information

2 **Rapid and sensitive immunoassay for alpha-fetoprotein in serum by fabricating primary**

3 **antibody-enzyme complexes using protein self-assembly**

4 Zilong Liu<sup>‡a</sup>, Xing Liu<sup>‡a</sup>, Hua Pei<sup>b</sup>, Kunlu Bao<sup>a</sup>, Benchao Su<sup>a</sup>, Hongmei Cao<sup>a</sup>, Long Wu<sup>a</sup>, Qi Chen<sup>a,c\*</sup>

5 <sup>a</sup> Key Laboratory of Tropical and Vegetables Quality and Safety for State Market Regulation, School of Food Science and

6 Engineering, Hainan University, Haikou 570228, China;

7 <sup>b</sup> Department of Clinical Laboratory, The Second Affiliated Hospital of Hainan Medical University, Haikou 570311, China;

8 <sup>c</sup> National Engineering Research Center for Bioengineering Drugs and the Technologies, Institute of Translational Medicine,

9 Nanchang University, Nanchang 330031, China.

10 ‡ These authors contributed equally to this work.

11 \* Correspondence: [qichen@ncu.edu.cn](mailto:qichen@ncu.edu.cn) (QC).

12

13

|    |                          |     |
|----|--------------------------|-----|
| 14 | <b>Table of contents</b> |     |
| 15 | Table S1.....            | s-3 |
| 16 | Table S2.....            | s-4 |
| 17 | Table S3.....            | s-5 |
| 18 | Figure S1.....           | s-6 |
| 19 | Figure S2.....           | s-7 |
| 20 |                          |     |
| 21 |                          |     |
| 22 |                          |     |

23 **Table S1.** The gene sequence of self-assembling peptides (C4bp $\alpha$  C-terminal fragment residues 541-  
 24 597, C4bp $\alpha$ ) and the primers for the construction of pET-22b-A1-C4bp $\alpha$ -ALP.

| Name                  | Sequence                                                                                                                                                                                 |
|-----------------------|------------------------------------------------------------------------------------------------------------------------------------------------------------------------------------------|
| C4bp $\alpha$<br>gene | GAAACCCCGGAAGGTTGCGAACAGGTTCTGACCGGCAAACGTCT<br>GATGCAGTGCCTGCCGAATCCGGAAGATGTGAAAATGGCCCTGG<br>AAGTTTATAAACTGAGTCTGGAAATCGAGCAGCTGGAAGTCAA<br>CGCGATAGCGCACGCCAGAGTACCCTGGATAAAGAAGTCTG |
| A1-F                  | cccagccggcgatggccatggCCCAGGTGCAGCTCGTGG                                                                                                                                                  |
| A1-R                  | gccTTGTGGTTTTGGTGTCTTGGG                                                                                                                                                                 |
| ALP-F                 | ataaagaactgGGAGGAGGCGGTTTCAGGC                                                                                                                                                           |
| ALP-R                 | ctcgagtgcggcgcgaagcttTTTCAGCCCCAGAGCGGC                                                                                                                                                  |
| C4-F                  | agacaccaaaccacaaGGCGGCGGTGGCAGCGGT                                                                                                                                                       |
| C4-R                  | gcctcctccCAGTTCTTTATCCAGGGTACTCTGG                                                                                                                                                       |

27 **Table S2.** The amino acid sequence of A1-ALP and A1-C4bp $\alpha$ -ALP fusion protein.

| Name                                                                                                                      | Sequence                                                                                                                                                                                                                                                                                                                                                                                                                                                                                                                                                                                                                                                                                                                                                                                                                                                                                                                                                                                                                      |
|---------------------------------------------------------------------------------------------------------------------------|-------------------------------------------------------------------------------------------------------------------------------------------------------------------------------------------------------------------------------------------------------------------------------------------------------------------------------------------------------------------------------------------------------------------------------------------------------------------------------------------------------------------------------------------------------------------------------------------------------------------------------------------------------------------------------------------------------------------------------------------------------------------------------------------------------------------------------------------------------------------------------------------------------------------------------------------------------------------------------------------------------------------------------|
| A1-ALP fusion protein: A1 labeled in blue, ALP labeled in yellow and SBP labeled in red                                   | <p>                     QVQLVESGGGLVQSGGSLRSLSCAASMRGFRIVAGGWYRQSPGKQRELVADINYQDDTNYGDF<br/>                     VKGRFTISRDSAKNTLYLQMNSLKPEDTAVYYCSALSVIGNEFWGGTQVTVSSEPKTKPKQGG<br/>                     GSGGGGSGGGSTPEMPVLENRAAQGDITAPGGARRLTGDQTAALRDSLSDKPAKNIILLIGD<br/>                     GMGDSEITAARNYAEGAGGFFKGIDALPLTGQYTHYALNKKTKGKPDYVTDASAATAWSTGV<br/>                     KTYNGALGVDIHEKDHPTILEMAKAAGLATGNVSTAEELQGATPAALVAHVTSRKCYGPSATSE<br/>                     KCPGNALEKGGKGSITQLLNARADVTLGGGAKTFAETATAGEWQGKTLREQAQARGYQLVS<br/>                     DAASLNSVTEANQQKPLLGLFADGNMPVRWLGPKATYHGNIDKPAVTCTPNPQRNDSVPTLA<br/>                     QMTDKAIELLSKNEKGFFLQVEGASIDKQNHANPCGQIGETVDLDEAVQRALEFAKKEGNTL<br/>                     VIVTADHAHASQIVAPDTKAPGLTQALNTKDGAVMVMSYGNSEEDSQEHTGSQLRIAAAYGPHA<br/>                     ANVVGLTDQTDLFYTMKAALGLK KLAALAEIKRASQPELAPEDPEDVEHHHHHH                 </p>                                                                                             |
| A1-C4bp $\alpha$ -ALP fusion protein: A1 sequence labeled in blue, C4bp $\alpha$ labeled in red and ALP labeled in yellow | <p>                     QVQLVESGGGLVQSGGSLRSLSCAASMRGFRIVAGGWYRQSPGKQRELVADINYQDDTNYGDF<br/>                     VKGRFTISRDSAKNTLYLQMNSLKPEDTAVYYCSALSVIGNEFWGGTQVTVSSEPKTKPKQGG<br/>                     GSGGGGSETPEGCEQVLTKRMLMQCLPNPEDVKMALEVYKLSLEIEQLELQRDSARQSTLTK<br/>                     ELGGGGSGGGSGGGSTPEMPVLENRAAQGDITAPGGARRLTGDQTAALRDSLSDKPAKNIIL<br/>                     LIGDGMGDSEITAARNYAEGAGGFFKGIDALPLTGQYTHYALNKKTKGKPDYVTDASAATAWS<br/>                     TGVKTYNGALGVDIHEKDHPTILEMAKAAGLATGNVSTAEELQGATPAALVAHVTSRKCYGPS<br/>                     ATSEKCPGNALEKGGKGSITQLLNARADVTLGGGAKTFAETATAGEWQGKTLREQAQARGY<br/>                     QLVSDAASLNSVTEANQQKPLLGLFADGNMPVRWLGPKATYHGNIDKPAVTCTPNPQRNDSVP<br/>                     TLAQMTDKAIELLSKNEKGFFLQVEGASIDKQNHANPCGQIGETVDLDEAVQRALEFAKKEG<br/>                     NTLVIVTADHAHASQIVAPDTKAPGLTQALNTKDGAVMVMSYGNSEEDSQEHTGSQLRIAAAYG<br/>                     PHAANVVGLTDQTDLFYTMKAALGLK KLAALAEIKRASQPELAPEDPEDVEHHHHHH                 </p> |

28  
29

30 **Table S3.** Optimization of capture antibody (5H7 monoclonal antibody) and heptavalent PACE (A1-  
 31 C4bp $\alpha$ -ALP) concentration by checkerboard titration.

| A1-C4-AP<br>( $\mu\text{g/mL}$ ) | 5H7 ( $\mu\text{g/mL}$ ) |       |       |       |       |
|----------------------------------|--------------------------|-------|-------|-------|-------|
|                                  | 4                        | 2     | 1     | 0.5   | 0     |
| 8                                | 1.684                    | 0.681 | 0.414 | 0.376 | 0.342 |
| 4                                | 1.648                    | 0.506 | 0.324 | 0.268 | 0.294 |
| 2                                | 1.384                    | 0.533 | 0.296 | 0.252 | 0.223 |
| 1                                | 0.955                    | 0.474 | 0.322 | 0.264 | 0.261 |
| 0.5                              | 0.385                    | 0.281 | 0.251 | 0.237 | 0.234 |
| 0                                | 0.23                     | 0.218 | 0.221 | 0.215 | 0.23  |

32

33

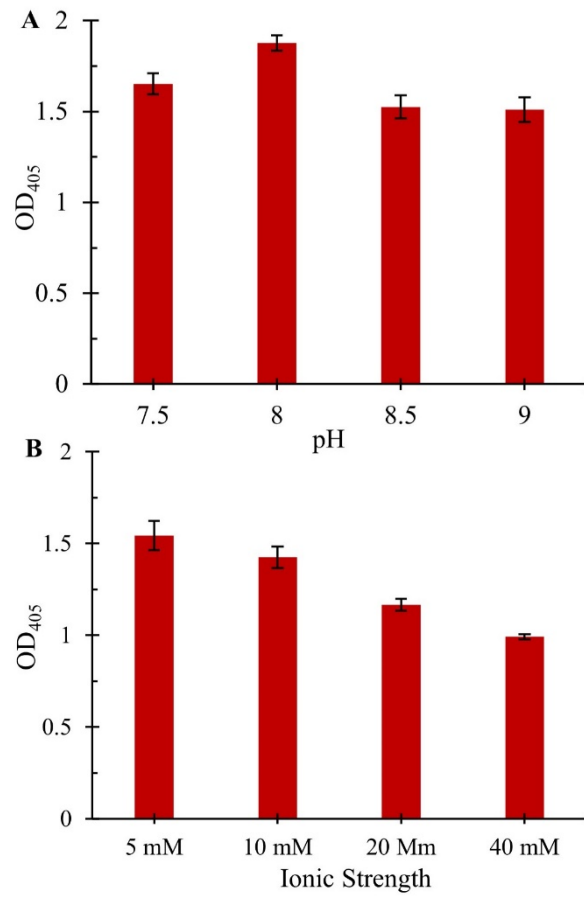

34

35 **Fig.S1.** Optimization of the proposed heptavalent PACE-based ELISA experimental parameters. (A): pH  
36 value; (B): Ionic strength. The error bars represent the standard deviation of three independent tests.

37

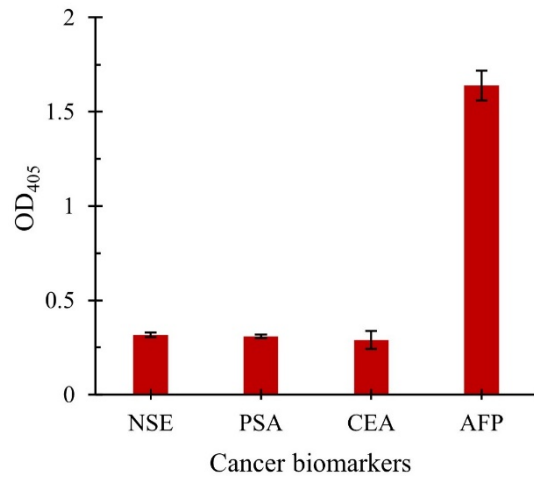

38

39 **Fig.S2.** Selectivity of the proposed heptavalent PACE-based ELISA for AFP. The error bars represent

40 the standard deviation of three independent tests.
